# Supplementary figures and images for: Abscisic Acid Induces Adventitious Rooting in Cucumber (Cucumis sativus L.) by Enhancing Sugar Synthesis
Source: MDPI journal article supplement (doi:10.3390/plants11182354), 2022-09-09

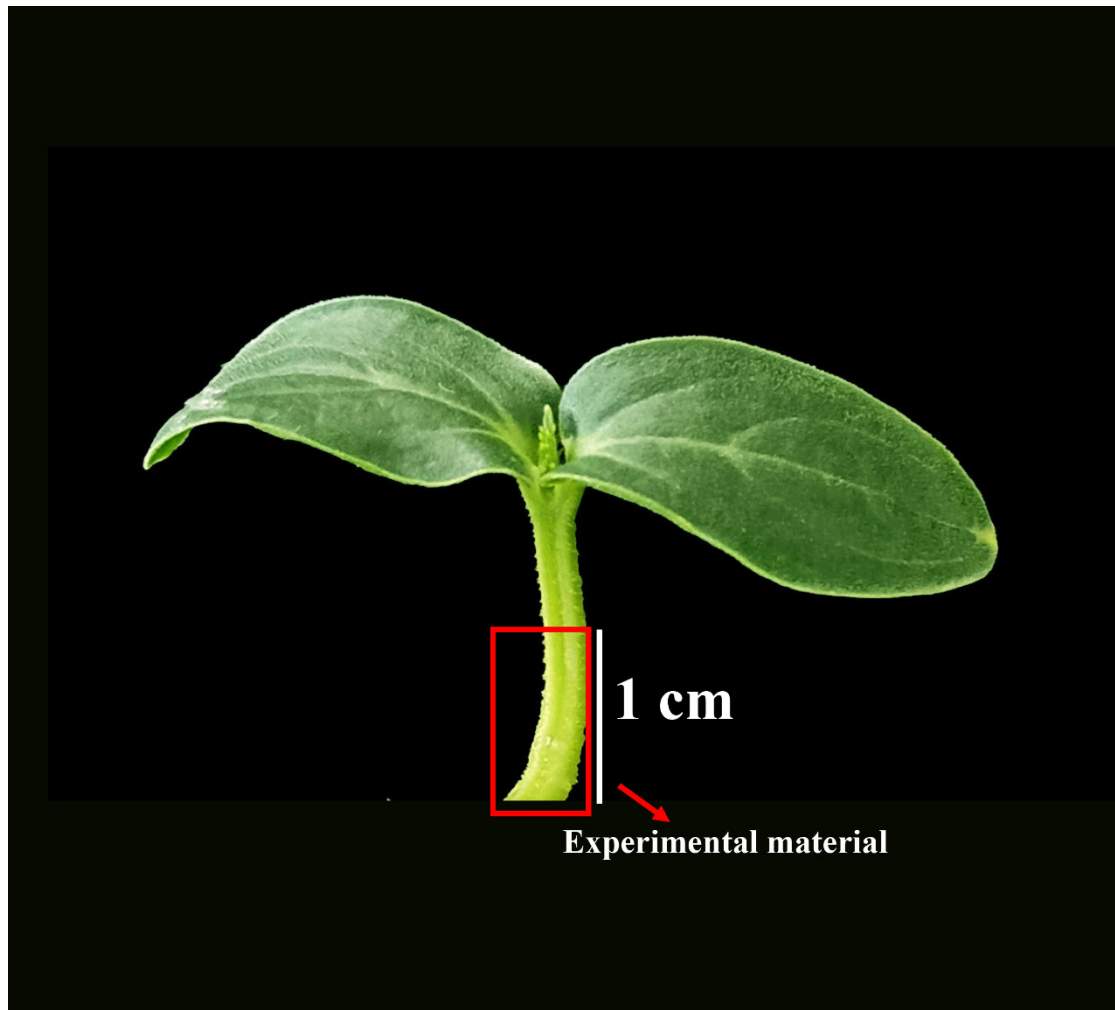

**Figure S1.** Patterns of cucumber explants and experimental materials

Supplement: s1 [file s1]
